# Supplementary material for: Electrically reading a light-driven molecular switch on 2D-Ti3C2Tx MXene via molecular engineering: towards responsive MXetronics
Source: Royal Society of Chemistry journal article supplement (doi:10.1039/d2ta03349f), 2022-01-01
Supplement: d2ta03349f1.pdf [file d2ta03349f1.pdf]

## Supporting Information

### Electrically Reading a Light-Driven Molecular Switch on 2D-Ti<sub>3</sub>C<sub>2</sub>T<sub>x</sub>

### MXene: Towards Responsive MXetronics

Jose Muñoz, Mario Palacios-Corella, Martin Pumera\*

#### Supporting Figures

|                                                        |   |
|--------------------------------------------------------|---|
| 1. Fabrication of the 3D-nCE (transducer system) ..... | 2 |
| 2. FTIR characterization .....                         | 3 |
| 3. TGA characterization .....                          | 4 |
| 4. UV-vis (switch) .....                               | 5 |
| 5. Z-potential and DLS (switch) .....                  | 6 |
| 6. Contact angle (switch) .....                        | 7 |
| 7. CV (control experiment) .....                       | 8 |

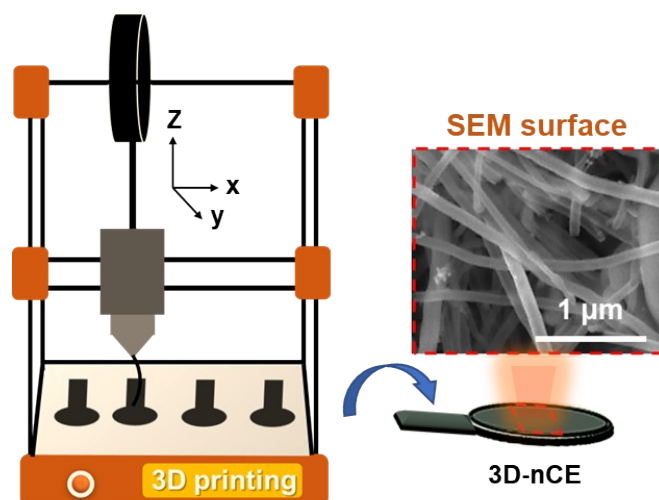

**Figure S1. 3D-printing setup employed for 3D-nCE fabrication.** 3D-nCE were manufactured by fused deposition modeling technology using a Prusa i3 MK3 printer (Prusa Research, Czech Republic). Briefly, a commercially available graphene/polylactic acid nanocomposite filament (Black Magic 3D filament, USA) was utilized as the conductive material. For the printing, the filament was extruded down through the nozzle (0.4 mm) at 215 °C (bed temperature: 60 °C). The geometric area of the 3D-nCE (corresponding to the spheric part of the device, as depicted in the illustration) was 0.28 cm<sup>2</sup>. To electrically activate the 3D-nCE, the electrode was immersed in DMF for 180 min in order to partially remove the insulating polylactic acid polymer of the electrode surface. Inset: Morphological image of the activated 3D-nCE surface taken by SEM.

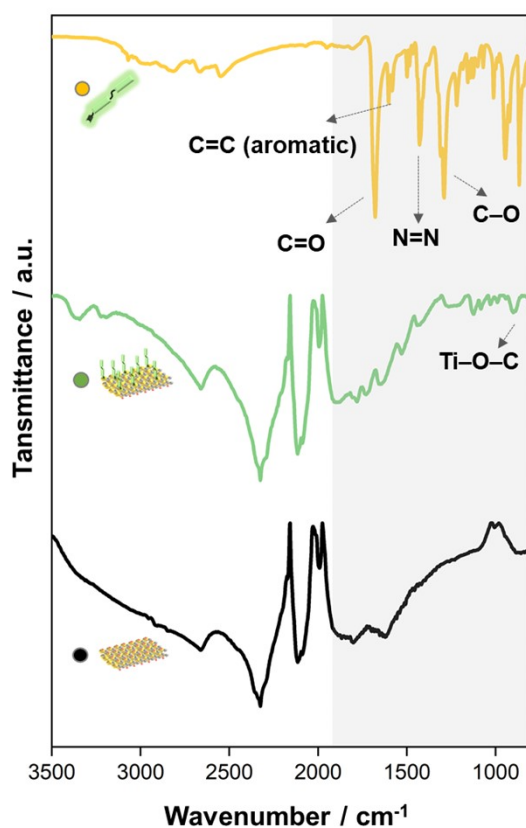

**Figure S2. FTIR spectra of pristine  $\text{Ti}_3\text{C}_2\text{T}_x$ , functionalized  $\text{AZO@Ti}_3\text{C}_2\text{T}_x$  and raw AZO molecule.**

The basic characteristic peaks of raw AZO molecule were identified in the region from 1700 to 850  $\text{cm}^{-1}$ , which includes the stretching vibration of C=O at 1685  $\text{cm}^{-1}$ , the stretching vibration of C=C at 1569  $\text{cm}^{-1}$ , the stretching vibration of N=N at 1420  $\text{cm}^{-1}$  and the stretching vibration of C-O at 1278  $\text{cm}^{-1}$ . Such characteristic features observed in that region were clearly transferred to photo-responsive  $\text{AZO@Ti}_3\text{C}_2\text{T}_x$ . Further, the new peak at 886  $\text{cm}^{-1}$  in the  $\text{AZO@Ti}_3\text{C}_2\text{T}_x$ , which corresponds to the stretching vibration of Ti-O-C, elucidates the covalent nature of the grafting.

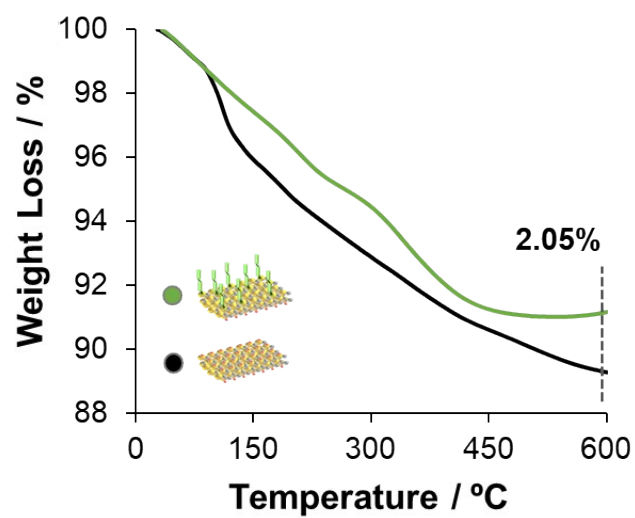

**Figure S3.** TGA curves of pristine 2D-Ti<sub>3</sub>C<sub>2</sub>T<sub>x</sub> and functionalized AZO@Ti<sub>3</sub>C<sub>2</sub>T<sub>x</sub>. Analyses were carried out in a N<sub>2</sub> atmosphere with a ramp temperature of 10 °C·min<sup>-1</sup>.

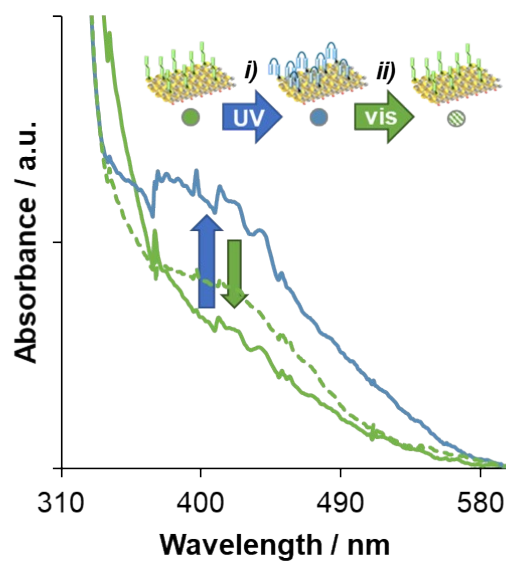

**Figure S4. Optical properties of the photo-responsive AZO@Ti<sub>3</sub>C<sub>2</sub>T<sub>x</sub>.** UV-vis spectra of the photo-responsive AZO@Ti<sub>3</sub>C<sub>2</sub>T<sub>x</sub> before and after irradiating the material with *i*) UV light and *ii*) green light for 15 min to promote a reversible bistable molecular switch ( $E\text{-AZO@Ti}_3\text{C}_2\text{T}_x \leftrightarrow Z\text{-AZO@Ti}_3\text{C}_2\text{T}_x$ ).

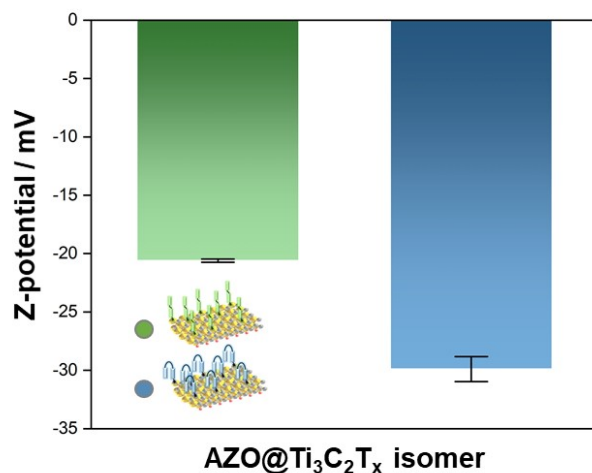

**Figure S5. Z-potential of the photo-responsive AZO@Ti<sub>3</sub>C<sub>2</sub>T<sub>x</sub> at the two different states.**  $\zeta$ -potential (in mV) of the photo-responsive AZO@Ti<sub>3</sub>C<sub>2</sub>T<sub>x</sub> before (*E*-AZO@Ti<sub>3</sub>C<sub>2</sub>T<sub>x</sub>) and after irradiating with UV light for 15 min (*Z*-AZO@Ti<sub>3</sub>C<sub>2</sub>T<sub>x</sub>). This change is in line with the straight-to-bent transition of AZO molecule. Accordingly, a lower  $\zeta$ -potential value is expected after UV light irradiation since the charge is confined in a lower particle size, resulting in a decrease from  $-20.6 \pm 0.1$  mV (*E*-AZO@Ti<sub>3</sub>C<sub>2</sub>T<sub>x</sub>) to  $-29.9 \pm 0.7$  mV (*Z*-AZO@Ti<sub>3</sub>C<sub>2</sub>T<sub>x</sub>). Experiments were run per triplicate ( $n = 3$ ) using a Malvern Zetasaizer (solvent: deionized water; material concentration:  $0.01 \text{ mg} \cdot \text{mL}^{-1}$ ).

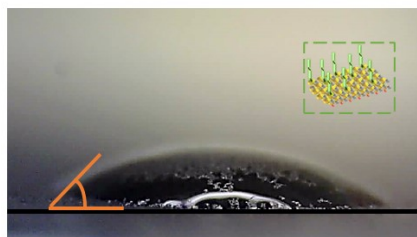

$$\theta = 49.6 \pm 0.2^\circ$$

**Figure S6. Reversibility of the water contact angle after green light irradiation.** After irradiating the previous  $Z\text{-AZO@Ti}_3\text{C}_2\text{T}_x$  form with visible light for 15 min (in order to promote the  $Z/E$  transition), the resulting  $E\text{-AZO@Ti}_3\text{C}_2\text{T}_x$  exhibited a water contact angle value of  $49.6 \pm 0.2^\circ$ . This value is higher than the one achieved by the photo-responsive  $\text{AZO@Ti}_3\text{C}_2\text{T}_x$  after UV irradiation ( $44 \pm 1^\circ$ ) and close to the one exhibited before UV irradiation ( $51.2 \pm 0.7^\circ$ ).

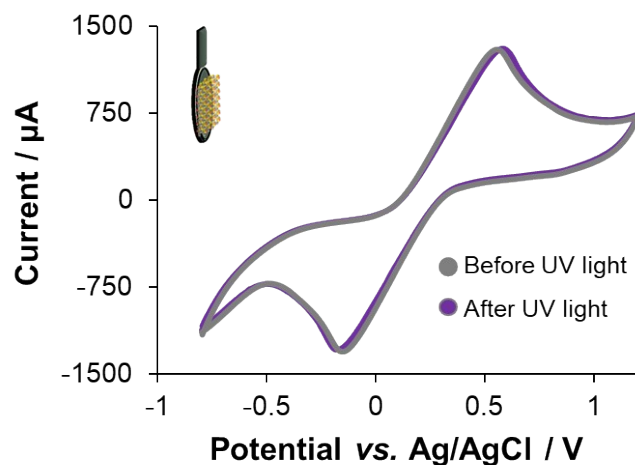

**Figure S7. Control electrochemical experiment at the MXetronic made of pristine 2D-Ti<sub>3</sub>C<sub>2</sub>T<sub>x</sub>.** CV at the control MXetronic before and after UV light irradiation for 15 min, demonstrating that no significant electrochemical changes by means of  $\Delta E$  and  $I_p$  values can be reached without the presence of the photo-responsive AZO molecule.
